# Supplementary material for: Novel Non-Cyclooxygenase Inhibitory Derivative of Sulindac Inhibits Breast Cancer Cell Growth In Vitro and Reduces Mammary Tumorigenesis in Rats
Source: Cancers (Basel). 2023 Jan 20;15(3):646. doi: 10.3390/cancers15030646 (PMC9913705; doi:10.3390/cancers15030646)
Supplement: Supplementary file 1 [file cancers-15-00646-s001.zip › cancers-2121305-supplementary.pdf]

## p-VASP<sup>Ser239</sup>

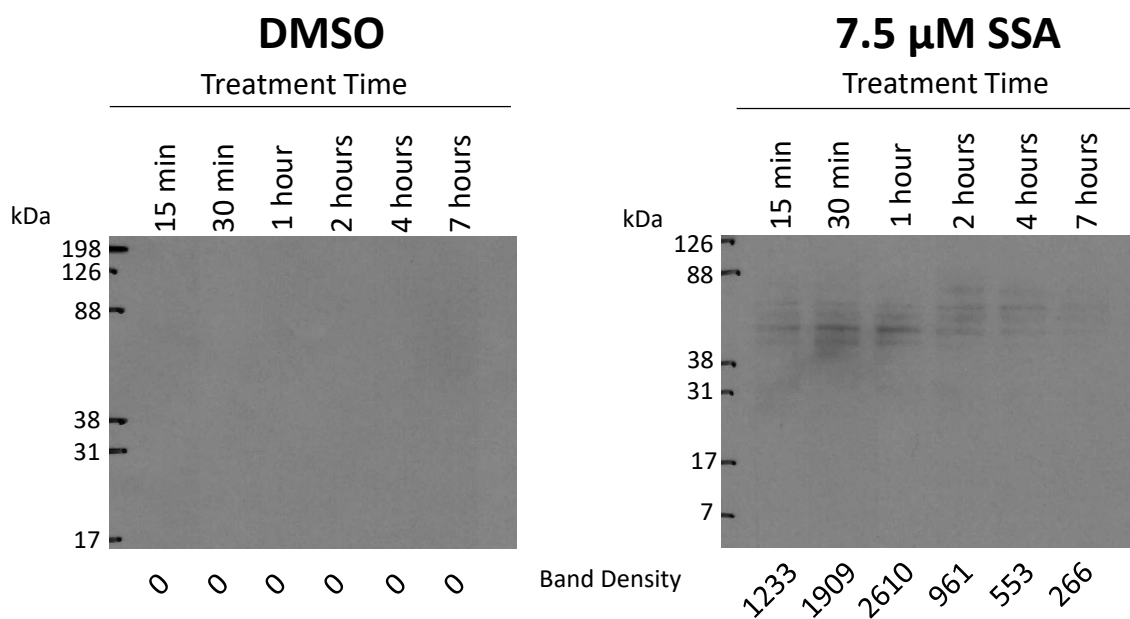

## Cyclin D1

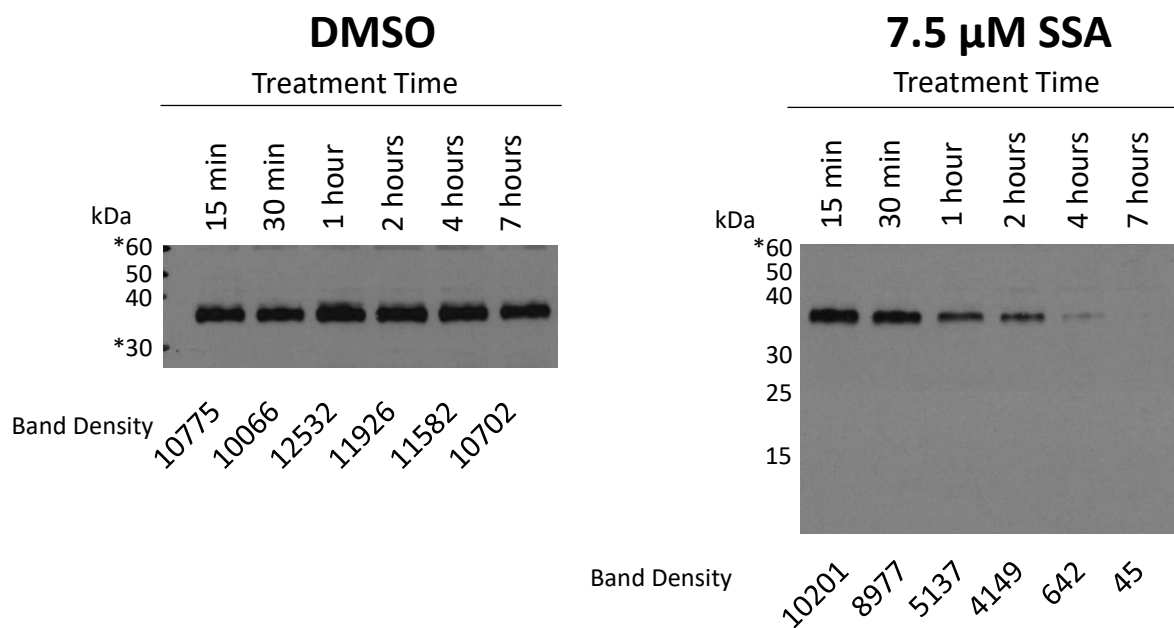

\*To reduce error from separate gels/blots, blots were cut at indicated markers prior to probing with primary antibody.

## Survivin

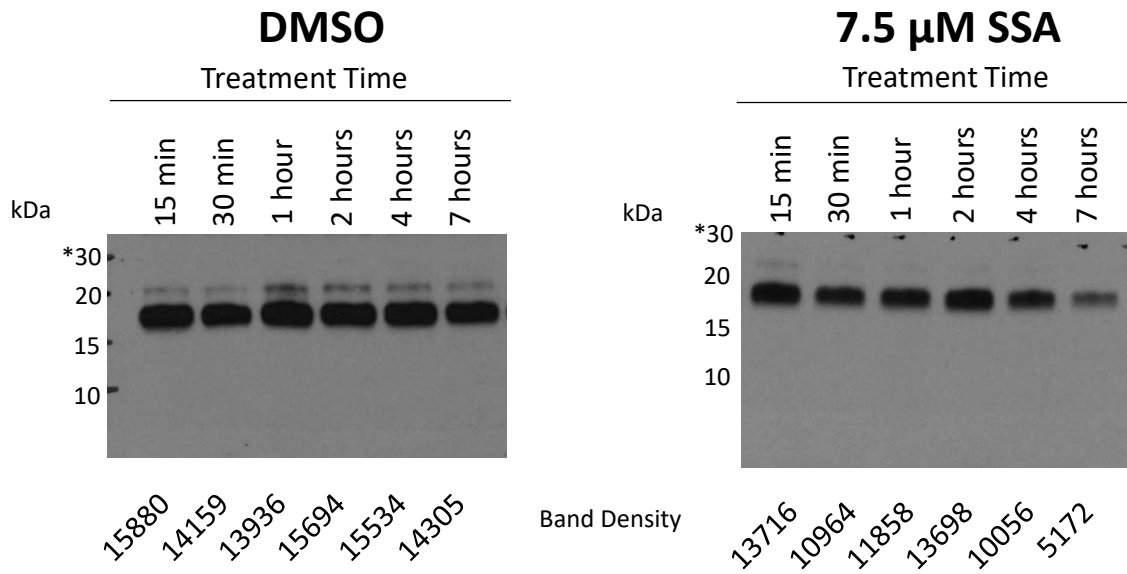

## Actin

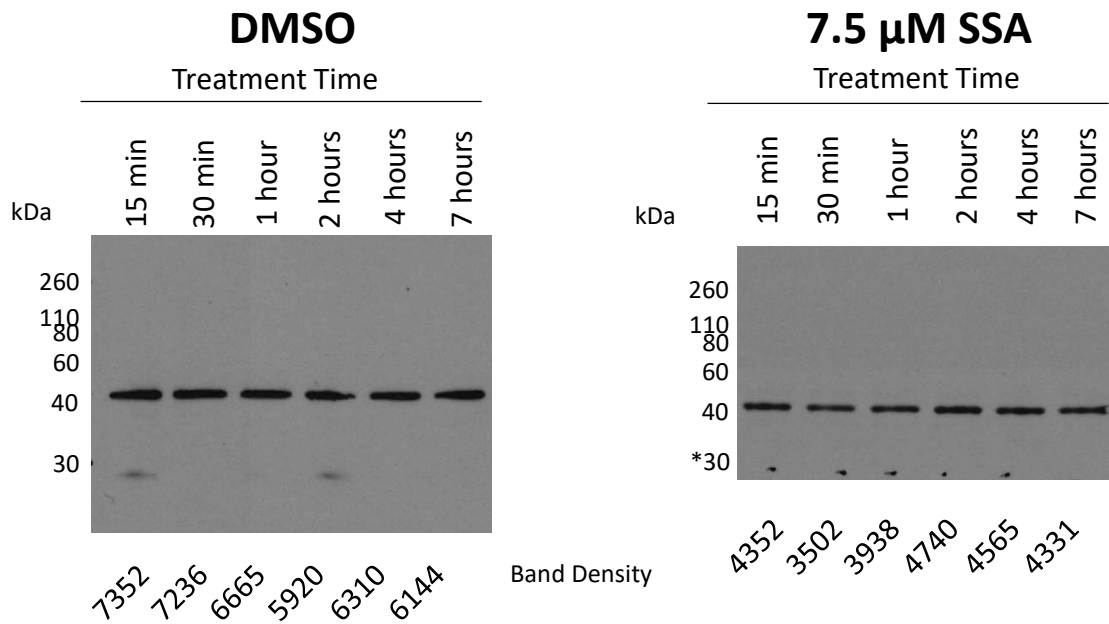

\*To reduce error from separate gels/blots, blots were cut at indicated markers prior to probing with primary antibody.
